# Supplementary material
Source: PubMed Central journal article supplement (PMC3210032)
Supplement: Supp_Data.pdf [file Supp_Data.pdf]

## Supplementary Data

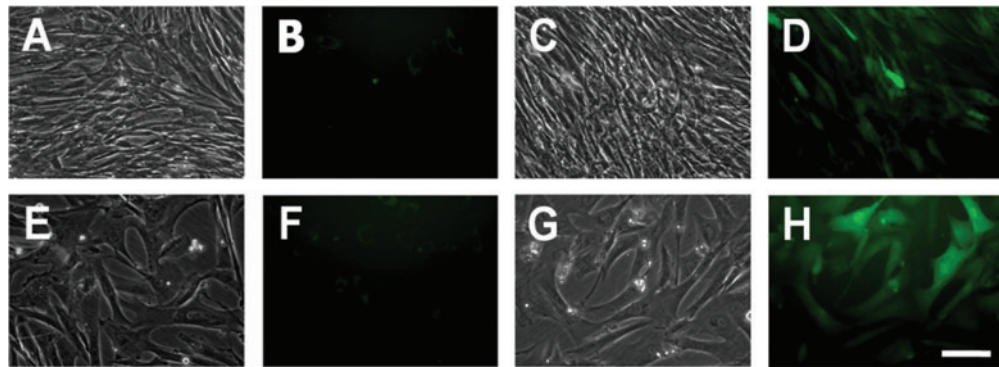

**SUPPLEMENTARY FIG. S1.** Lentivirus-infected canine fibroblasts show YFP expression. (A, B) Uninfected canine skin fibroblasts (CSFs); (C, D) infected CSFs; (E, F) uninfected CTFs; (G, H) infected CTFs. Scale bar: 100  $\mu$ m. CTF, canine testicular fibroblast.

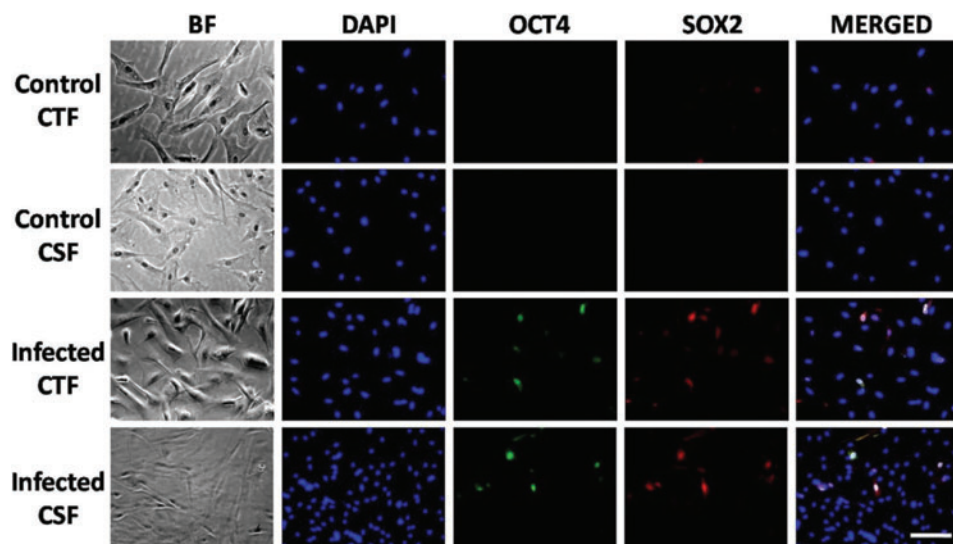

**SUPPLEMENTARY FIG. S2.** Immunocytochemistry of human OCT4 and SOX2 after transduction. CTFs and CSFs on day 3 after viral transduction partially express introduced genes (human OCT4 and SOX2), whereas the uninfected CTFs and CSFs remain negative after immunostaining. The DNA was labeled by DAPI staining. Scale bar: 250  $\mu$ m.

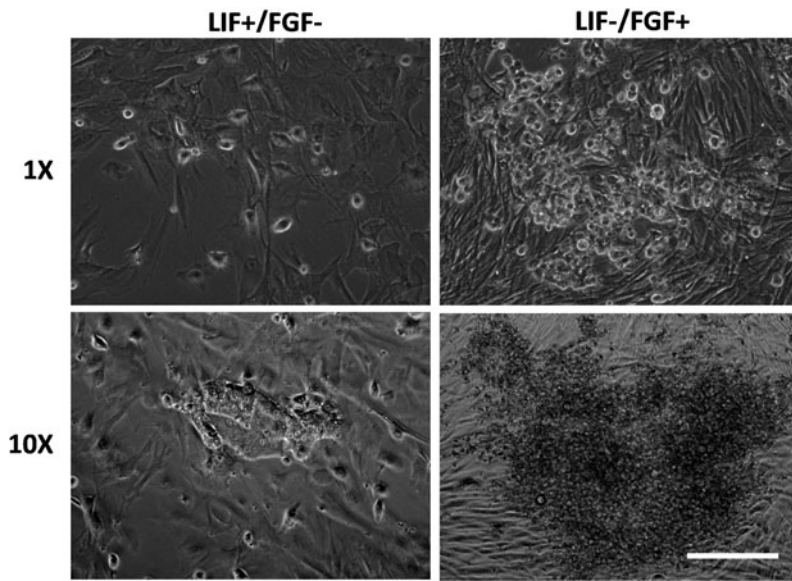

**SUPPLEMENTARY FIG. S3.** Leukemia inhibitory factor (LIF) and basic fibroblast growth factor (bFGF) dependency of canine induced pluripotent stem cells (ciPSCs). Morphology of the canine donor cells on day 10 after viral infection based on different treatments of growth factors. The cells were cultured, respectively, with human LIF (LIF+) or bFGF (FGF+) in concentrations of  $1 \times$  (10 ng/mL for human LIF and 4 ng/mL for bFGF) or  $10 \times$  (100 ng/mL for human LIF and 40 ng/mL for bFGF). Scale bar: 250  $\mu$ m.

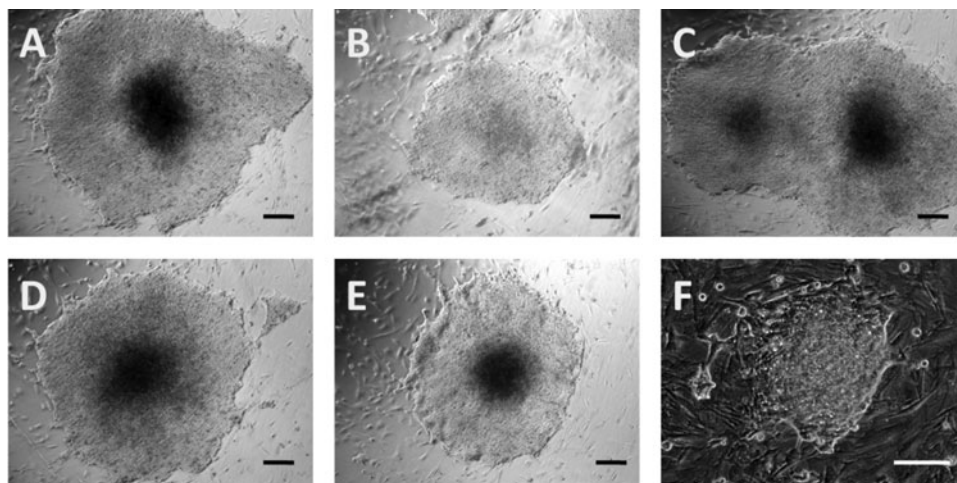

**SUPPLEMENTARY FIG. S4.** The ciPSCs derived from the second batch of donor fibroblasts. (A–E) The typical ciPSC colonies from cell line DI-B1 to DI-B5 at P1; (F) the first colony of cell line DI-B2 on day 9 postviral transduction. Scale bar: 100  $\mu$ m.

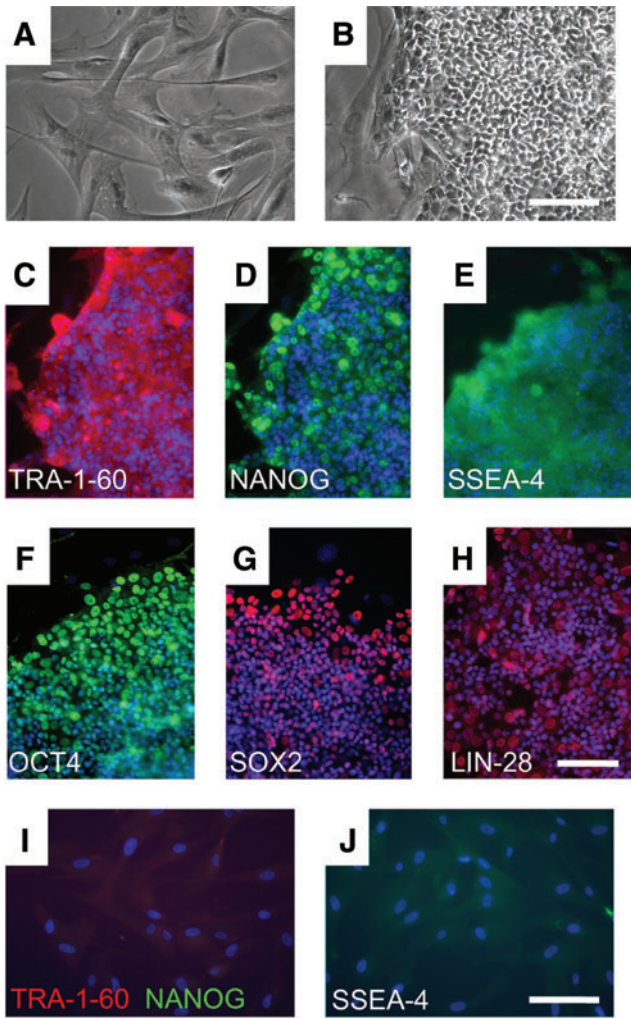

**SUPPLEMENTARY FIG. S5.** Immunocytochemistry of DI-A1, DI-A2, and CTFs. **(A)** Phase-contrast image of canine fibroblasts used for ciPSC generation at P3. **(B)** Phase-contrast image of ciPSCs at P7. **(C–H)** Immunocytochemistry of pluripotency markers in ciPSCs as labeled. The pluripotency markers include **(C)** TRA-1-60, **(D)** NANOG, **(E)** SSEA-4, **(F)** OCT4, **(G)** SOX2, and **(H)** LIN-28. **(I, J)** Examples showing that pluripotency markers are not expressed in input canine fibroblasts. DNA was labeled by DAPI staining and shown in blue. Scale bar: 250  $\mu\text{m}$ .

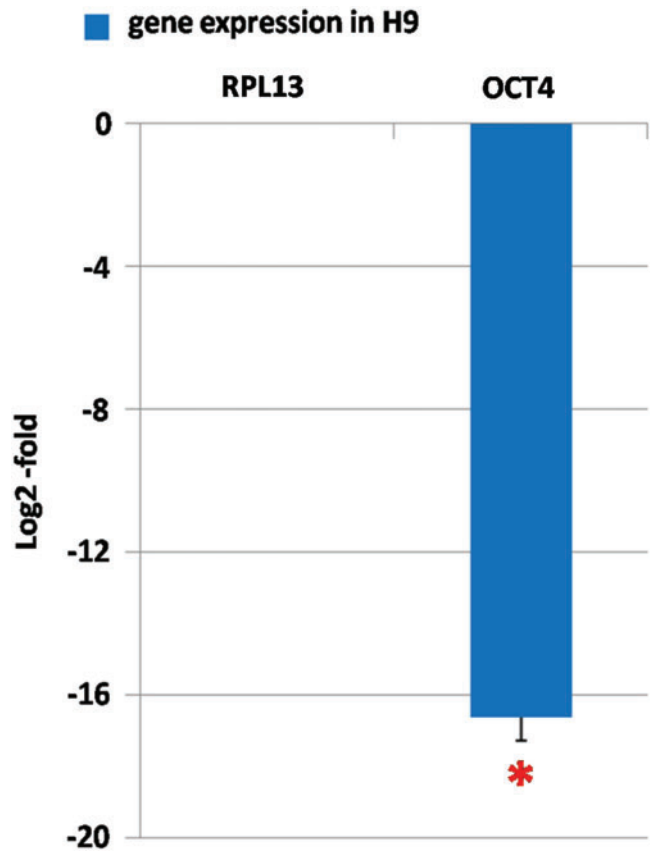

**SUPPLEMENTARY FIG. S6.** Validation of specificity of canine OCT4 primers for ciPSCs. Quantitative reverse transcription–polymerase chain reaction analysis of relative transcript amount of canine RPL13 and OCT4 in human ESC H9. The  $y$ -axis represents the fold change ( $\text{Log}_2$ ) relative to RPL13. \* $P < 0.05$ .

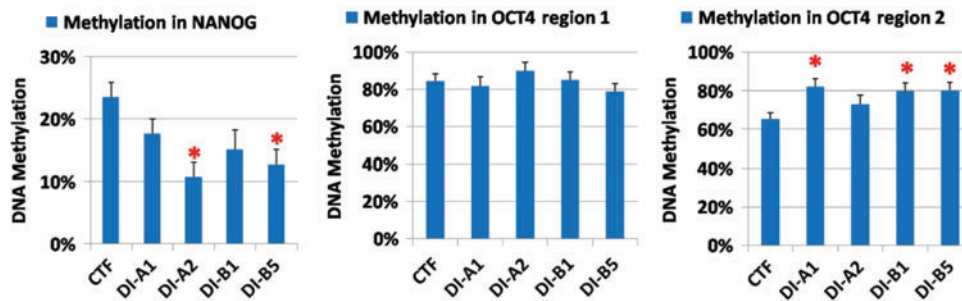

SUPPLEMENTARY FIG. S7. Epigenetics analysis of ciPSCs. Bisulfate genomic sequencing for DNA methylation in the promoter regions of canine NANOG and OCT4 within CTFs and ciPSC lines DI-A1, DI-A2, DI-B1, and DI-B5. The percentages of methylation in 4 ciPSC lines are compared with that in CTF by PROC GLM from SAS. Error bars stand for the standard errors of each column. \* $P < 0.05$ .

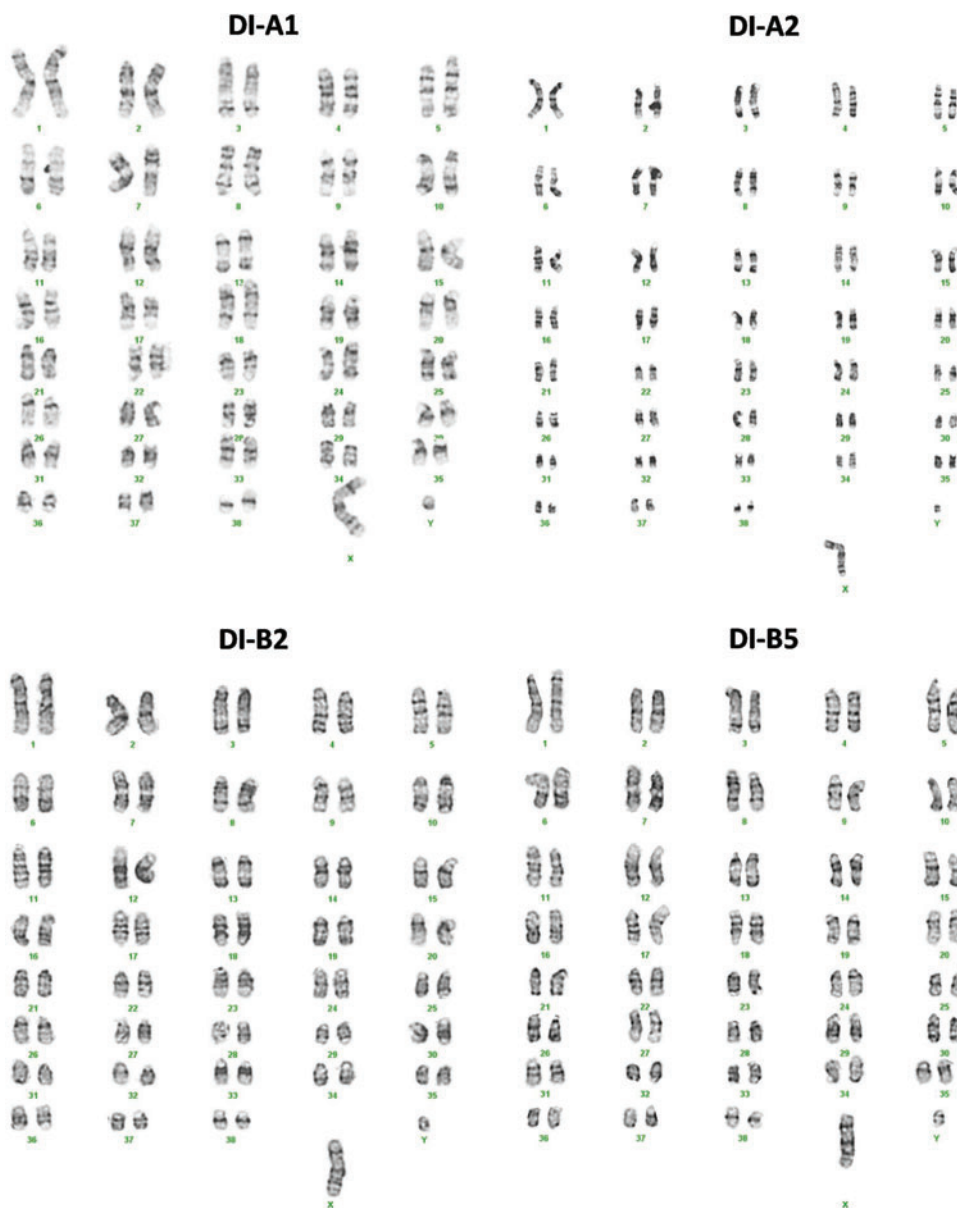

SUPPLEMENTARY FIG. S8. Karyotype analysis of ciPSCs. G-banding chromosomes of DI-A1 (P4), DI-A2 (P3), DI-B2 (P4), and DI-B5 (P5) demonstrate the normal male karyotypes.

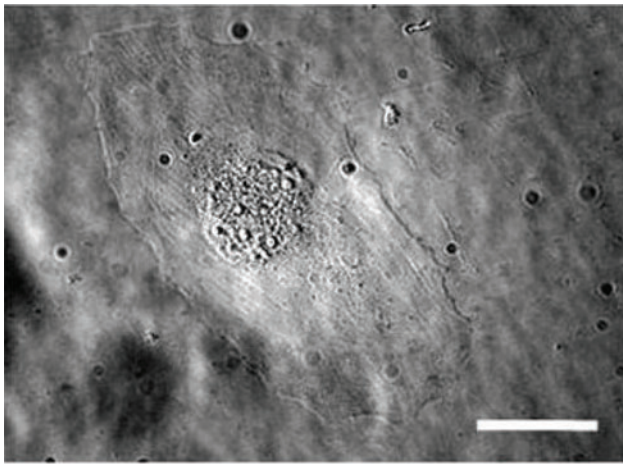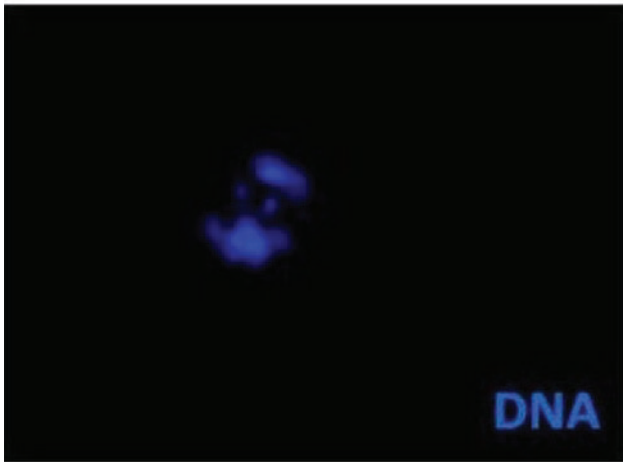

**SUPPLEMENTARY FIG. S9.** Morphology and DNA staining of ciPSC-differentiated trophoblast cell-like cell. Scale bar: 100  $\mu\text{m}$ .

**DNA**

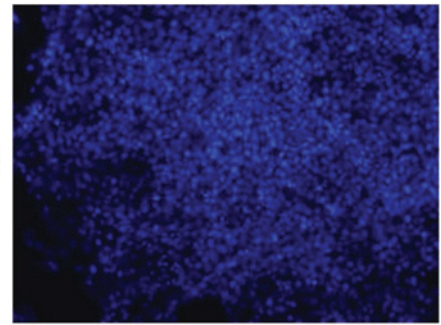

**TUNEL**

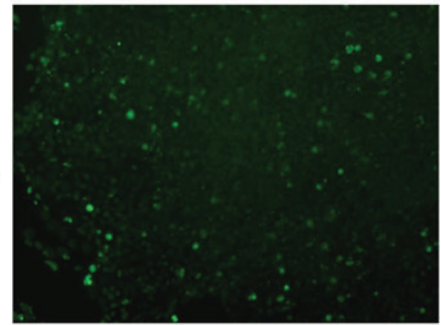

**MERGED**

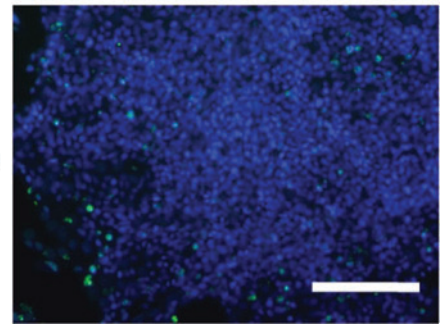

**SUPPLEMENTARY FIG. S10.** Terminal deoxynucleotidyl transferase dUTP nick-end labeling assay for the DNase-treated ciPSCs as the positive control. Green cells represent the apoptotic cells. Scale bar: 250  $\mu\text{m}$ .

SUPPLEMENTARY TABLE S1. ANTIBODIES USED FOR IMMUNOCYTOCHEMISTRY ASSAY

| <i>Antigen</i>                  | <i>Catalog no.</i> | <i>Isotype</i> | <i>Manufacturer</i>                     | <i>Concentration</i> |
|---------------------------------|--------------------|----------------|-----------------------------------------|----------------------|
| OCT4                            | SC8628             | Goat IgG       | Santa Cruz Biotechnology                | 1:300                |
| SOX2                            | AB5603             | Rabbit IgG     | Abcam                                   | 1:500                |
| NANOG                           | SC33759            | Rabbit IgG     | Santa Cruz Biotechnology                | 1:500                |
| LIN-28                          | 67266              | Rabbit IgG     | Santa Cruz Biotechnology                | 1:250                |
| SSEA-4                          | MC813-70           | Mouse IgG      | Abcam                                   | 1:500                |
| TRA-1-60                        | 09-0009            | Mouse IgG      | Stemgent                                | 1:250                |
| Fibronectin                     | HFN7.1             | Mouse IgG      | Abcam                                   | 1:500                |
| TUJ1                            | 14545              | Mouse IgG      | Abcam                                   | 1:7,000              |
| Vimentin                        | AMF17B             | Mouse IgG      | Developmental Studies<br>Hybridoma Bank | 1:250                |
| AFP                             | SC8108             | Goat IgG       | Santa Cruz Biotechnology                | 1:500                |
| Cy-3 goat anti-mouse IgG + IgM  | 09-0038            | N/A            | Stemgent                                | 1:1,000              |
| Alexa 488 donkey anti-mouse IgG | A21207             | N/A            | Invitrogen                              | 1:1,000              |
| Alexa 488 donkey anti-goat IgG  | A11055             | N/A            | Invitrogen                              | 1:1,000              |

AFP, alpha-fetoprotein; IgG, immunoglobulin G; TUJ1,  $\beta$ -III neuron-specific tubulin.

SUPPLEMENTARY TABLE S2. PRIMERS DESIGNED FOR QUANTITATIVE REVERSE TRANSCRIPTION-POLYMERASE CHAIN REACTION

| <i>Primers</i> | <i>Sequence</i>    |                                                         |
|----------------|--------------------|---------------------------------------------------------|
| RPL13          | Forward<br>Reverse | GGAGAAGGCCAGAGTCATCACA<br>TTTGCCCTGATGCCAAAAG           |
| OCT            | Forward<br>Reverse | ACGATCAAGCAGTGACTATTTCG<br>GAGGGACTGAGGAGTAGAGCGT       |
| NANOG          | Forward<br>Reverse | CTAGGGACCCTTCTCCAATGC<br>CATTGGCAAGGATGCAGGAT           |
| TERT           | Forward<br>Reverse | TTACAGAGCATAGGAATCAGACAACCTC<br>GGTGTCTCCTGACCTCTGCTTCT |
| SOX2           | Forward<br>Reverse | AACCCCAAGATGCACAACCTC<br>CGGGGCCGGTATTTATAATC           |
| c-MYC          | Forward<br>Reverse | GGACGCGCAGAGGCTCTACC<br>GGTTTCCACTCTCCGAGGAG            |
| LIN-28         | Forward<br>Reverse | CCACCCAGCCCAAGAA<br>CAGTGGACACGAGGCTACCA                |
| SOCS3          | Forward<br>Reverse | CGAGAAGATCCCTCTGGTGTG<br>TTTCTCGTAGGAGTCCAGGTG          |
| STAT3          | Forward<br>Reverse | ACTGGCGTCCAGTTCACCTACCA<br>TGCGACATCCCCAGAGTCTTT        |
| GBX2           | Forward<br>Reverse | AAGGCTGGCAATGCCAATT<br>TGACTTCTGATAGCGAACCTGC           |
| FOXD3          | Forward<br>Reverse | GCAGAGCCCGCAGAAGAAG<br>GGGAAGCGGTTGCTAATGAA             |
| O-K            | Forward<br>Reverse | TCTCCCATGCATTCAAACG<br>GTGGAGAAAGATGGGAGCAG             |
| NESTIN         | Forward<br>Reverse | AGCCCTACTTCCCTCTCCTT<br>CTGAAGTGTGGGCGGGATGGGG          |
| NEFL           | Forward<br>Reverse | GGAAACTCTTGGAAGGTGAGGA<br>TAACCCACCATAGGCAGATCG         |
| CD34           | Forward<br>Reverse | CCTACAACAGCACCAGCCTTGT<br>CCGGAACATTTGATTCTCCCT         |
| GATA2          | Forward<br>Reverse | GCCACTGACCATGAAGAAGGAA<br>ACAGCTCCTCAAAGCACTCTGC        |
| CXCR4          | Forward<br>Reverse | ACTCCATGAAGGAACCCTGCTT<br>TGCCCACTATGCCAGTCAAGA         |
| AFP            | Forward<br>Reverse | CTGAAAACCCTCTTGAATGCCA<br>TTTCTGGAAAGAGGCCACAGCT        |
| CDX2           | Forward<br>Reverse | CCAAGTGAAAACCAGGACGAA<br>CGGATGGTGATGTAACGACTGT         |

SUPPLEMENTARY TABLE S3. PRIMERS DESIGNED FOR CANINE NANOG AND OCT4 PROMOTER REGIONS IN BISULFITE GENOMIC SEQUENCING

|             |                              |
|-------------|------------------------------|
| dNANOG1outF | GTATTTTTGATTTTAAAGGATGGA     |
| dNANOG1outR | AAAACCTCCACATATAAAAAATAAA    |
| dNANOG1in F | TAGAAATATTTAATTGTGGGGTT      |
| dNANOG1in R | CATATAAAAAATAAAAAAAAAACAAAAT |
| dOCT41out F | ATATAGGGAGGAGTGTTTAGGTTA     |
| dOCT41in F  | GAGGAGTGTTTAGGTTATTTTAT      |
| dOCT41in R  | CTCAACACCTCTCTCCCTCC         |
| dOCT41out R | AAAAACTCTCCTAAAACTACTCAA     |
| dOCT42out F | AGGTTAGTGGGTGGGATTGG         |
| dOCT42in F  | AGGTGTTGAGTAGTTTTTAGGAGA     |
| dOCT42in R  | ACTCCCACCTAAAATCCACAATA      |
| dOCT42out R | CCTAAAACAACAACCCCTACT        |

“Out” or “in” stands for that the primers were designed for the amplification of the outer or inner region in nested genomic polymerase chain reaction. “F” or “R” stands for the forward or reverse primers.

SUPPLEMENTARY TABLE S4. GENOTYPES FOR THE INDUCED PLURIPOTENT STEM CELLS USING FIVE CANINE TETRANUCLEOTIDE REPEAT MICROSATELLITES

| <i>Samples markers</i> | <i>CSF</i> | <i>CTF</i>             | <i>DI-A1</i>  | <i>DI-A2</i>  | <i>DI-B1</i>  | <i>DI-B2</i>  | <i>DI-B3</i>  | <i>DI-B4</i>  | <i>DI-B5</i> |
|------------------------|------------|------------------------|---------------|---------------|---------------|---------------|---------------|---------------|--------------|
| FH2054                 | 157, 162   | 150, 166 <sup>ab</sup> | 150, 166      | 150, 166      | 150, 166      | 150, 165      | N/A           | 150, 165      | 150, 166     |
| FH2165                 | 386, 394   | 453, 470               | 453, 470      | 453, 470      | 453, 470      | 453, 470      | 453, 470      | 453, 470      | 453, 470     |
| FH2233 <sup>c</sup>    | 359, 367   | 281, 351, 409          | 281, 351, 409 | 281, 351, 409 | 281, 351, 409 | 281, 351, 408 | 281, 351, 409 | 281, 351, 409 | N/A          |
| FH2313                 | 269, 272   | 293, 307               | 293, 307      | 293, 307      | 292, 306      | 292, 306      | 292, 306      | 292, 306      | 292, 306     |
| FH2324                 | 253, 262   | 253, 257               | 253, 257      | 253, 257      | 253, 257      | 253, 257      | 253, 257      | 253, 257      | 253, 257     |

<sup>a</sup>Allele sizes are shown without the M13 tail used to label the amplicons so that direct comparisons can be made with the allele frequency data of Irion et al. [1].

<sup>b</sup>Sizes are rounded to the nearest whole number. Single base differences among allele sizes are deemed to represent the same allele.

<sup>c</sup>This marker showed 3 alleles in all cell lines except CSF. The 3 alleles are caused by a duplication (“copy number polymorphism” or CNP) that contains the FH2233 marker [2].

CSF, canine skin fibroblast; CTF, canine testicular fibroblast.

## Supplementary References

1. Irion DN, AL Schaffer, TR Famula, ML Eggleston, SS Hughes and NC Pedersen. (2003). Analysis of genetic variation in 28 dog breed populations with 100 microsatellite markers. [Translated from Eng.] *J Hered* 94:81–87. [In Eng.]
2. Onogi A, M Nurimoto, Y Sato Y and M Morita. (2008). A chromosomal duplication that includes the canine microsatellite INRA21 in Labrador Retrievers. [Translated from Eng.] *Anim Genet* 39:241–248. [In Eng.]
